# Supplementary material
Source: MDPI journal article supplement (https://www.mdpi.com/1999-4907/13/11/1764)
Supplement: s1 [file s1]

**Table S1.** Correlation analysis between leaf traits and climatic factors.

|     | Longitude | Latitude | Altitude | Annual rainfall | Annual relative humidity | Annual temperature | Frost-free period | Light days |
|-----|-----------|----------|----------|-----------------|--------------------------|--------------------|-------------------|------------|
| FW  | 0.414     | 0.068    | -0.371   | 0.098           | 0.272                    | 0.249              | -0.338            | 0.176      |
| DW  | 0.421     | 0.066    | -0.3     | 0.051           | 0.500                    | 0.206              | -0.349            | 0.206      |
| LL  | 0.433     | 0.229    | -0.547   | 0.041           | -0.126                   | 0.226              | -0.384            | 0.094      |
| LW  | 0.329     | 0.052    | -0.406   | 0.215           | 0.322                    | 0.257              | -0.256            | 0.113      |
| LT  | 0.591*    | 0.477    | -0.600*  | -0.185          | 0.265                    | -0.069             | -0.592*           | 0.184      |
| LA  | 0.325     | 0.045    | -0.420   | 0.195           | 0.236                    | 0.246              | -0.259            | -0.049     |
| PL  | 0.236     | -0.176   | -0.034   | 0.148           | 0.211                    | 0.095              | -0.009            | 0.496      |
| LBA | 0         | -0.139   | -0.007   | 0.313           | 0.146                    | 0.268              | 0.113             | 0.078      |
| LWR | 0.458     | 0.467    | -0.577*  | -0.298          | 0.028                    | 0.069              | -0.478            | -0.406     |

\*,  $P < 0.05$

**Table S2.** Information on SNP loci associated with the leaf traits.

| No.    | Chr.    | Position  | Major | Minor | MAF  | Trait   |
|--------|---------|-----------|-------|-------|------|---------|
| SNP 1  | Chr. 1  | 653407383 | A     | G     | 0.19 | FW      |
| SNP 2  | Chr. 1  | 329802259 | G     | T     | 0.31 | FW, DW  |
| SNP 3  | Chr. 1  | 325310555 | C     | A     | 0.30 | LL      |
| SNP 4  | Chr. 2  | 128834616 | C     | T     | 0.06 | T       |
| SNP 5  | Chr. 2  | 180870775 | G     | T     | 0.16 | LA      |
| SNP 6  | Chr. 2  | 503986091 | A     | T     | 0.14 | LCD     |
| SNP 7  | Chr. 3  | 474775171 | T     | C     | 0.50 | FW      |
| SNP 8  | Chr. 5  | 385039508 | G     | T     | 0.08 | FW, DW  |
| SNP 9  | Chr. 5  | 299221419 | T     | C     | 0.13 | LW, LA  |
| SNP 10 | Chr. 5  | 87047307  | C     | T     | 0.05 | LCD     |
| SNP 11 | Chr. 5  | 87078717  | G     | A     | 0.05 | LCD     |
| SNP 12 | Chr. 5  | 87369397  | C     | A     | 0.05 | LCD     |
| SNP 13 | Chr. 6  | 186059721 | G     | A     | 0.21 | T       |
| SNP 14 | Chr. 6  | 435653798 | G     | A     | 0.06 | LCD     |
| SNP 15 | Chr. 7  | 631466137 | T     | A     | 0.17 | LW      |
| SNP 16 | Chr. 7  | 631214933 | G     | A     | 0.15 | LW      |
| SNP 17 | Chr. 8  | 99490954  | G     | A     | 0.06 | LBA     |
| SNP 18 | Chr. 8  | 100114220 | C     | A     | 0.07 | LBA     |
| SNP 19 | Chr. 8  | 69440895  | C     | A     | 0.05 | LCD     |
| SNP 20 | Chr. 9  | 461048418 | C     | A     | 0.06 | LW      |
| SNP 21 | Chr. 9  | 463063980 | G     | T     | 0.35 | LW      |
| SNP 22 | Chr. 9  | 463266035 | G     | T     | 0.14 | LW, LA  |
| SNP 23 | Chr. 9  | 23793644  | T     | G     | 0.09 | T       |
| SNP 24 | Chr. 10 | 288332022 | G     | A     | 0.45 | LCD     |
| SNP 25 | Chr. 12 | 451114175 | G     | T     | 0.05 | LL, LCD |
| SNP 26 | Chr. 12 | 451384229 | T     | C     | 0.06 | LL      |
| SNP 27 | Chr. 12 | 451988693 | A     | G     | 0.05 | LL, LCD |
| SNP 28 | Chr. 12 | 447512684 | C     | A     | 0.05 | LL, LCD |
| SNP 29 | Chr. 12 | 446382735 | G     | A     | 0.05 | LL      |

MAF: Minimum allele frequency

**Table S3.** Information on the genes related to leaf traits.

| <b>Position</b> | <b>Genes</b>                                                                                                                        | <b>Number</b> | <b>Trait</b> |
|-----------------|-------------------------------------------------------------------------------------------------------------------------------------|---------------|--------------|
| Chr.1           | Gb_14716, Gb_14717, Gb_14718, Gb_14732, Gb_14733                                                                                    | 5             | FW           |
|                 | Gb_38577                                                                                                                            | 1             | FW,<br>DW    |
|                 | Gb_24923, Gb_24924, Gb_24930, Gb_07471                                                                                              | 4             | LL           |
| Chr.2           | Gb_23926, Gb_23927                                                                                                                  | 2             | LA           |
|                 | Gb_22428, Gb_22429, Gb_22430                                                                                                        | 3             | LWR          |
| Chr.3           | Gb_16176, Gb_16184, Gb_16183, Gb_16175, Gb_16174, Gb_16182                                                                          | 6             | FW           |
| Chr.5           | Gb_07046, Gb_07047, Gb_07048, Gb_23845, Gb_23846, Gb_32368                                                                          | 6             | FW,<br>DW    |
|                 | Gb_06189, Gb_06190, Gb_20962, Gb_20963, Gb_20964, Gb_20965, Gb_20966, Gb_20967,<br>Gb_20969, Gb_20970                               | 10            | LWR          |
|                 | Gb_07535, Gb_07536, Gb_07537, Gb_07538, Gb_07539, Gb_07540                                                                          | 6             | LW,<br>LA    |
| Chr.6           | Gb_11455, Gb_26569, Gb_26570, Gb_26571, Gb_26572, Gb_26573, Gb_26574, Gb_26575,<br>Gb_26576, Gb_26577, Gb_26578, Gb_26581, Gb_26582 | 13            | LWR          |
|                 | Gb_26689, Gb_32934, Gb_32935, Gb_32936, Gb_33508, Gb_33509, Gb_33510                                                                | 7             | LT           |
| Chr.7           | Gb_07127, Gb_07133, Gb_07134, Gb_07135                                                                                              | 4             | LW           |
| Chr.8           | Gb_31092, Gb_31094, Gb_31093, Gb_31095, Gb_31100, Gb_31101, Gb_31102, Gb_31103,<br>Gb_31104, Gb_31105, Gb_31106                     | 11            | LBA          |
|                 | Gb_22260, Gb_22259, Gb_22258, Gb_22257, Gb_22255, Gb_22270, Gb_22256                                                                | 7             | LWR          |
| Chr.9           | Gb_21434, Gb_21435, Gb_23126, Gb_23127, Gb_23130                                                                                    | 5             | LW           |
|                 | Gb_08606, Gb_17294, Gb_17295, Gb_17296, Gb_17297, Gb_23123                                                                          | 6             | LW,<br>LA    |
|                 | Gb_07578, Gb_07579, Gb_07580, Gb_07581, Gb_07582, Gb_04105, Gb_04106                                                                | 7             | LT           |
| Chr.10          | Gb_28311, Gb_11667, Gb_29243                                                                                                        | 3             | LWR          |
| Chr.12          | Gb_07853, Gb_07854, Gb_07855, Gb_07856, Gb_38804, Gb_22201                                                                          | 6             | LL,<br>LWR   |
| Total           |                                                                                                                                     | 112           |              |
